# Supplementary material for: Cyanobacterial Mats in Calcite-Precipitating Serpentinite-Hosted Alkaline Springs of the Voltri Massif, Italy
Source: MDPI journal article supplement (doi:10.3390/microorganisms9010062), 2020-12-29
Supplement: s1 [file s1]

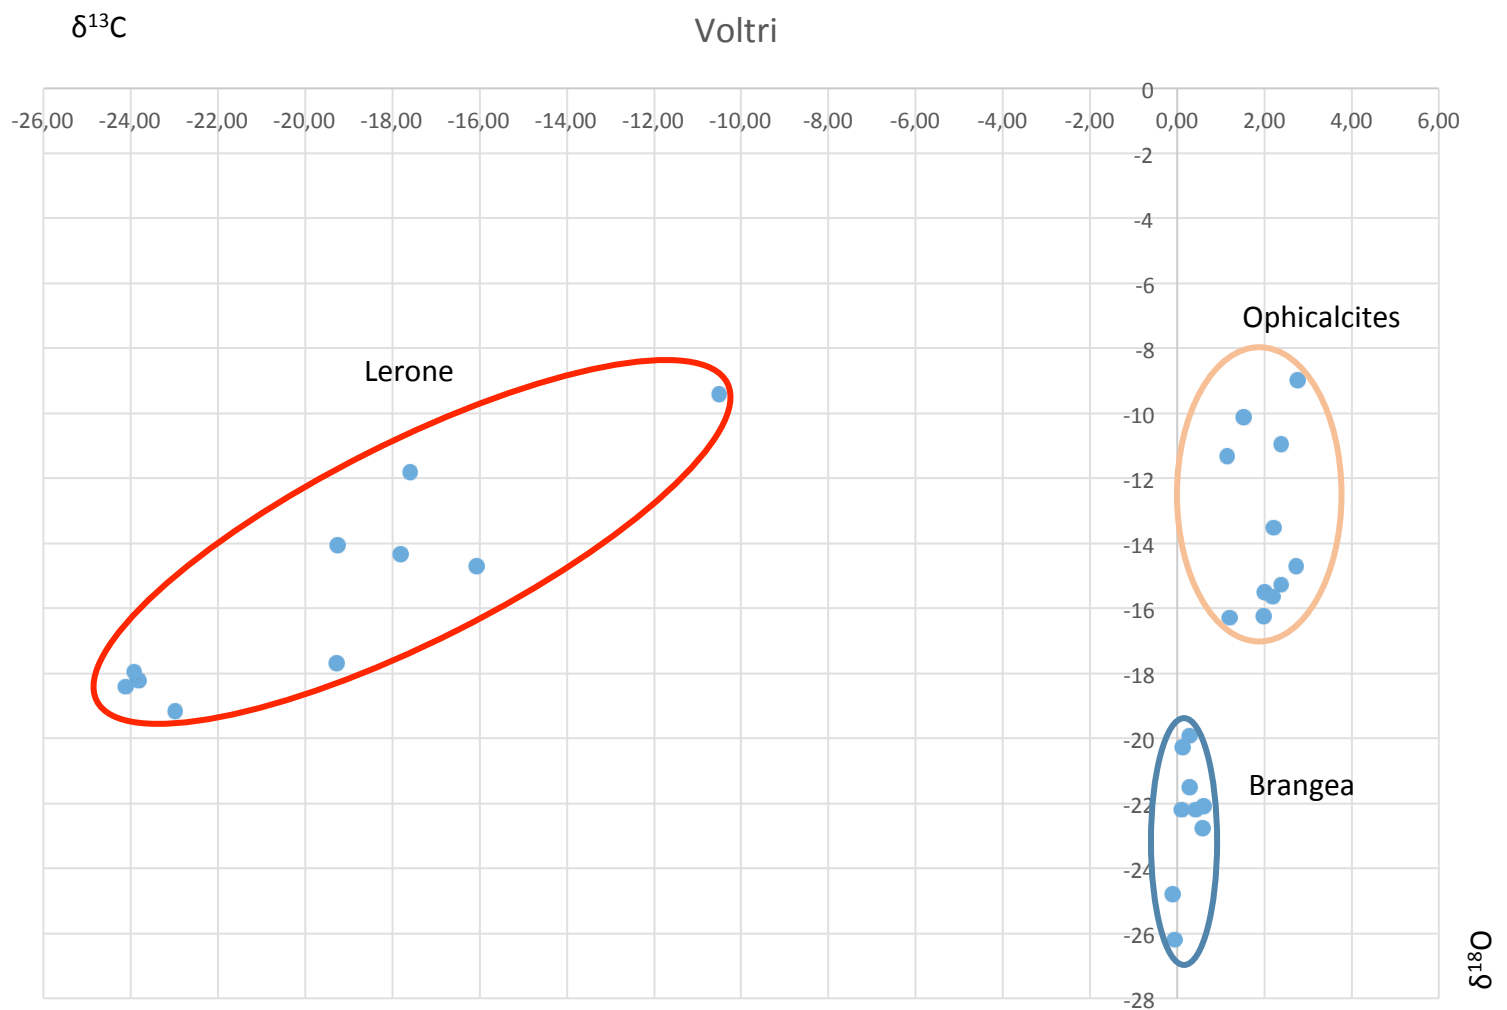

**Figure S1:** Stable  $\delta^{13}\text{C}_{\text{CaCO}_3}$  and  $\delta^{18}\text{O}_{\text{CaCO}_3}$  isotopic records of samples from carbonate buildups (Torrente Lerone/Torrente Branega sampling sites as indicated) and samples from cemented carbonate fractures within ophicalcites NE of Bonassola/La Spezia.

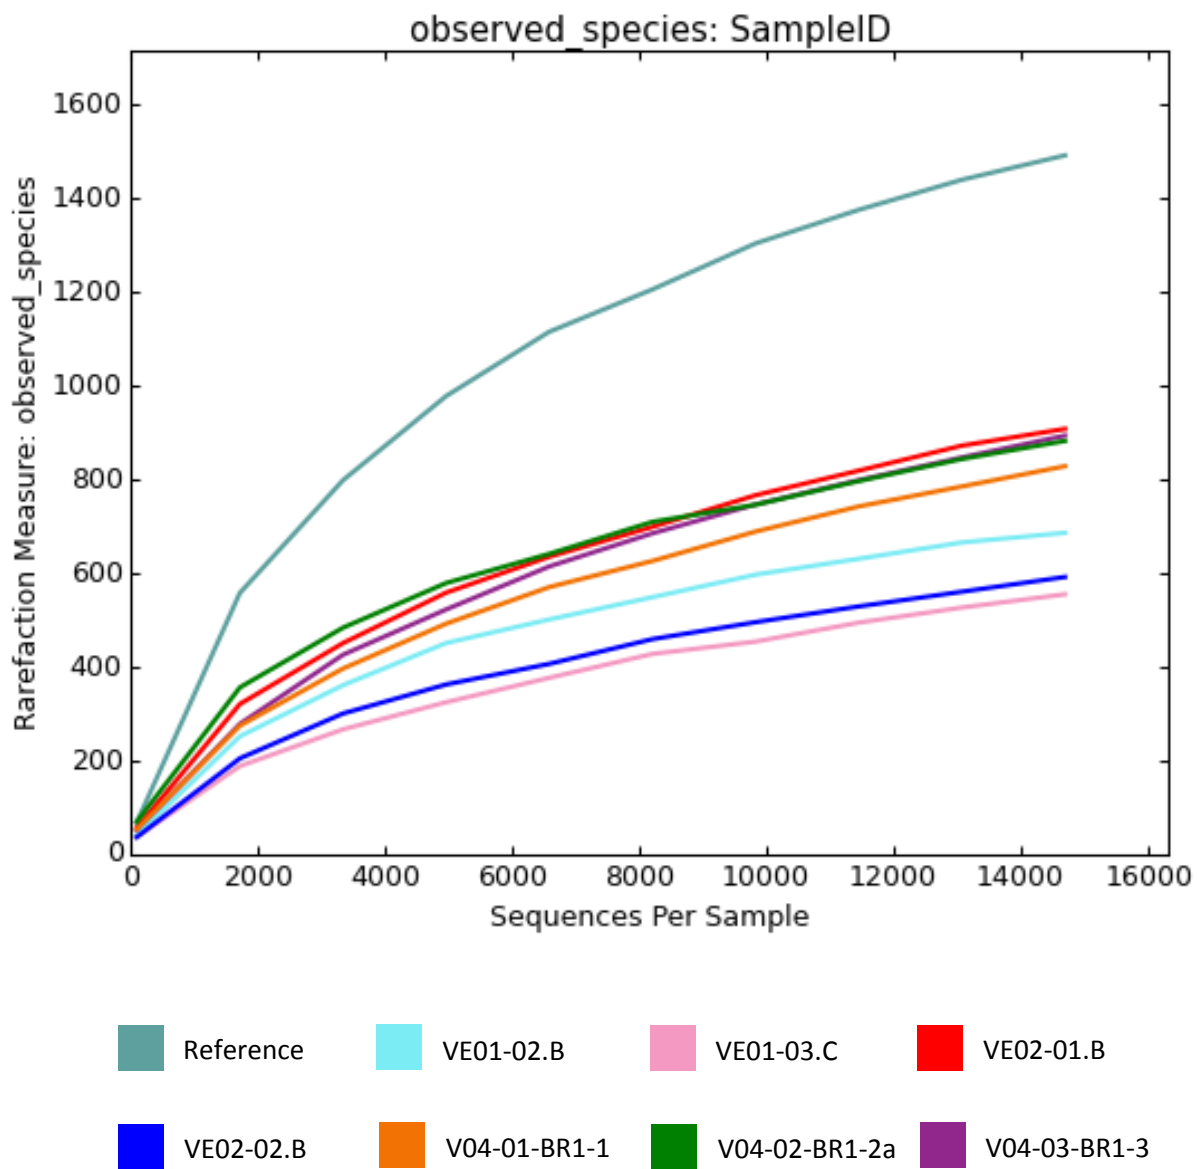

**Figure S2:** Rarefaction curve depicting all samples as indicated.
